# Supplementary material
Source: publisher site journal article supplement (https://www.dovepress.com/article/375419)

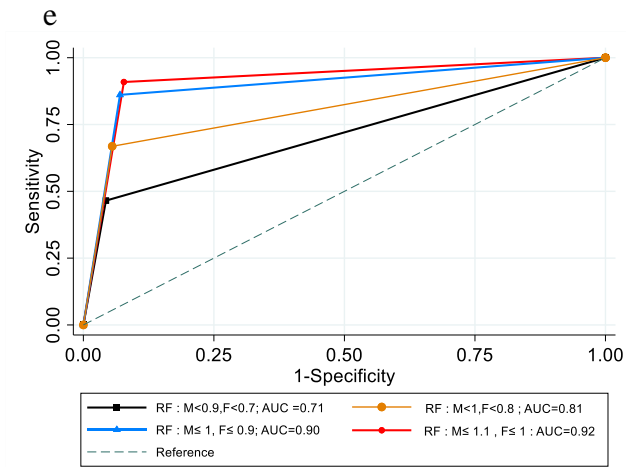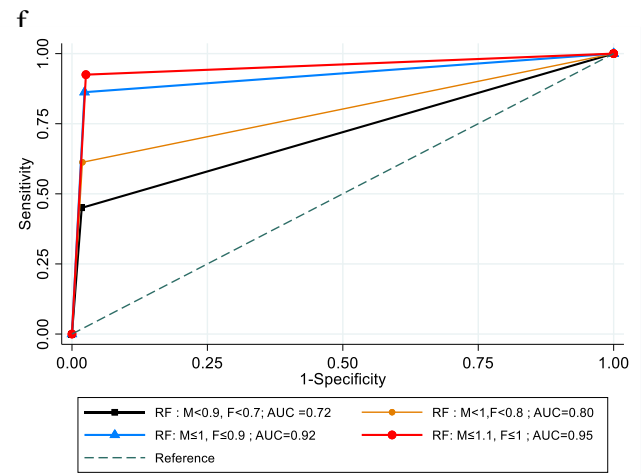

Supplement 1. The AUROC of sarcopenia (e) and severe sarcopenia (f)

Supplement: Supplementary file 1 [file get_supplementary_file.php]
